# Supplementary material
Source: PubMed Central journal article supplement (PMC11422956)
Supplement: media-14.pdf [file media-14.pdf]

**Supplementary Materials for**

**PDGFR $\alpha$  signaling regulates Srsf3 transcript binding to affect PI3K signaling and endosomal trafficking**

Thomas E. Forman *et al.*

Corresponding author: Katherine A. Fantauzzo, [katherine.fantauzzo@cuanschutz.edu](mailto:katherine.fantauzzo@cuanschutz.edu)

**The PDF file includes:**

Figs. S1 to S6  
Tables S1, S7 and S16

**Other Supplementary Material for this manuscript includes the following:**

Tables S2-S6 and S8-S15

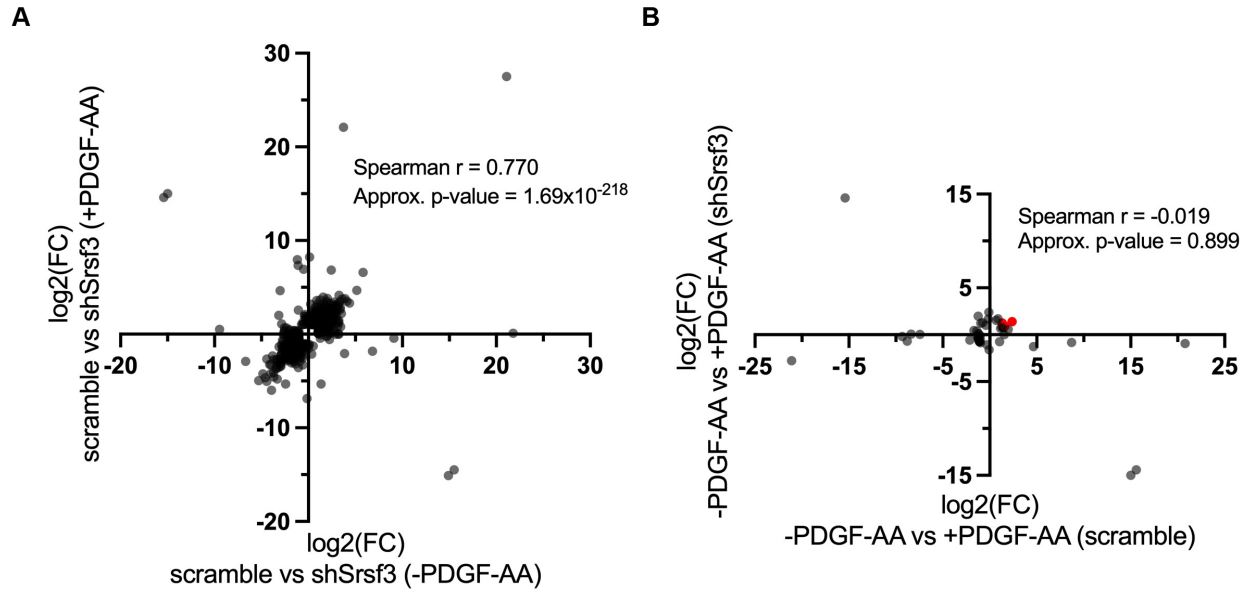

**Figure S1. High correlation of Srsf3-dependent differentially-expressed genes across ligand treatment conditions. (A,B)** Scatter dot plots depicting Srsf3-dependent (A) and PDGF-AA-dependent (B) differentially-expressed genes.  $\log_2(\text{fold change})$  (FC) values represent  $\log_2(\text{shSrsf3 normalized counts}/\text{scramble normalized counts})$  (A) or  $\log_2(+\text{PDGF-AA normalized counts}/-\text{PDGF-AA normalized counts})$  (B). Spearman correlation values and approximate p-values are listed. Immediate early genes are represented in red in B.

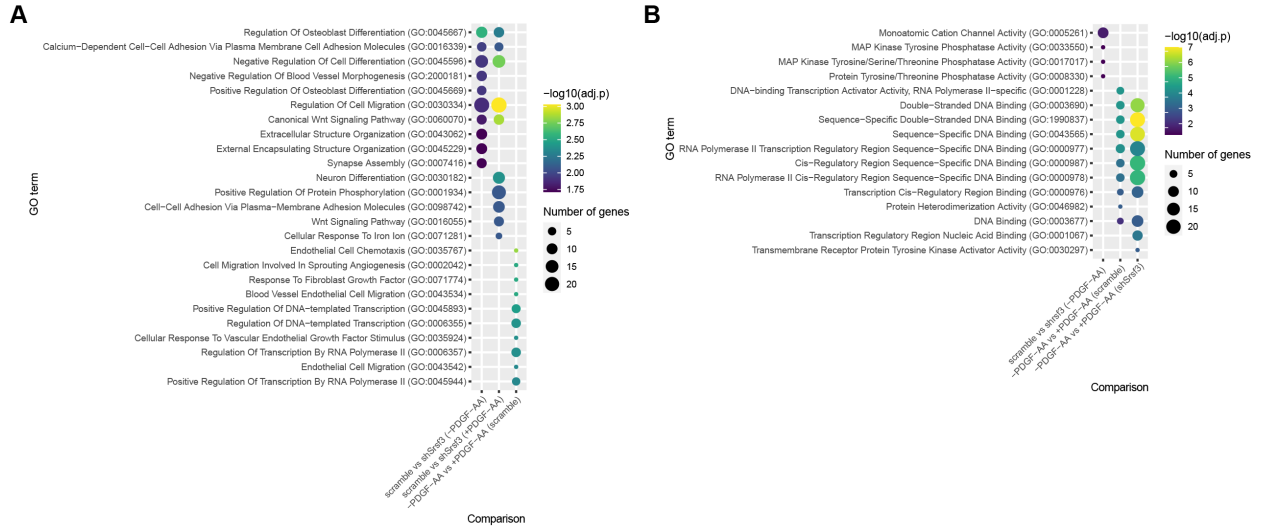

**Figure S2. Gene ontology analysis of differentially-expressed genes across treatment comparisons. (A,B)** Bubble plots depicting up to ten of the most significant gene ontology (GO) terms for biological process (A) and molecular function (B) for Srsf3-dependent and PDGF-AA-dependent differentially-expressed genes. Colors correspond to  $-\log_{10}(\text{adjusted p-value})$ ; sizes correspond to number of genes.

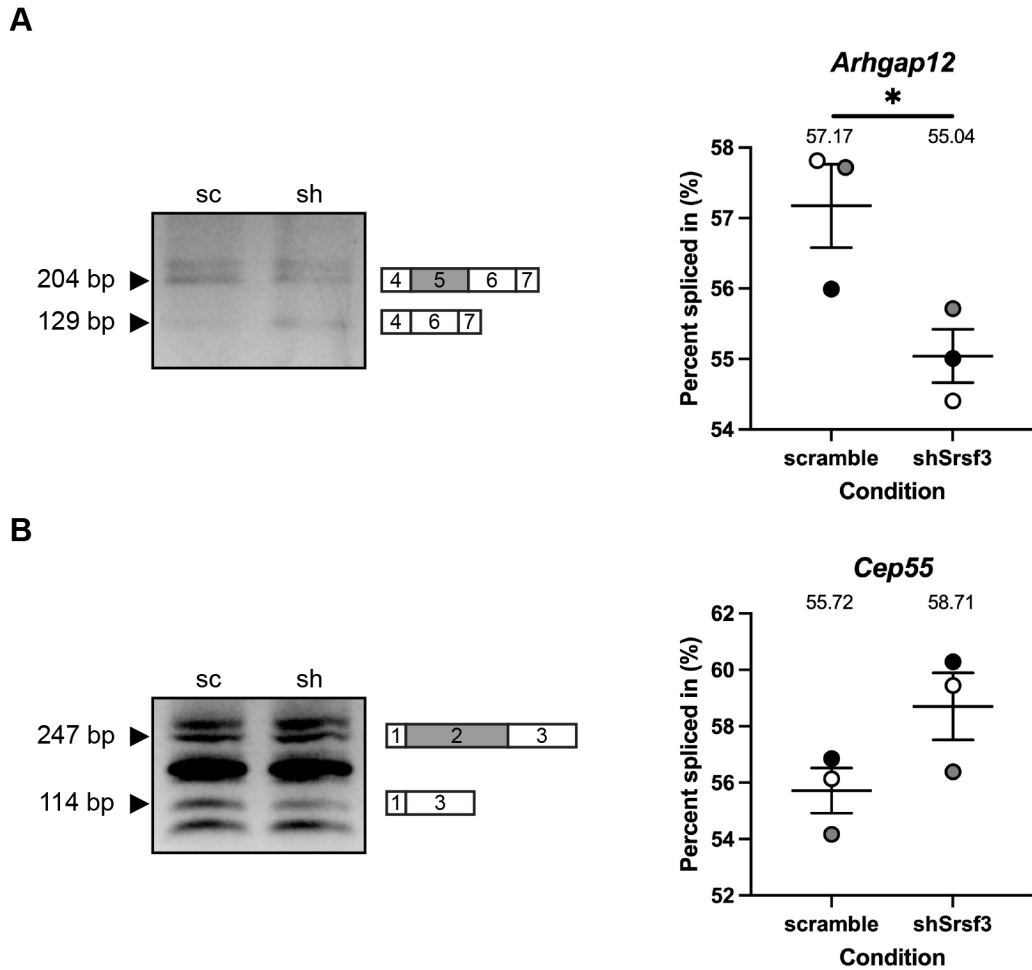

**Figure S3. qPCR validation of differential AS between scramble and shSrsf3 samples.** (A,B) Representative qPCR gels (left) with depictions of differentially alternatively-spliced exon (gray), and upstream and downstream sequences (white) that were assessed by qPCR in scramble (sc) versus shSrsf3 (sh) samples for *Arhgap12* (A) and *Cep55* (B). Scatter dot plots (right) depicting the percent spliced in from  $n = 3$  biological replicates as at left. Data are mean  $\pm$  s.e.m. \*,  $P < 0.05$ . Shaded circles correspond to independent experiments.

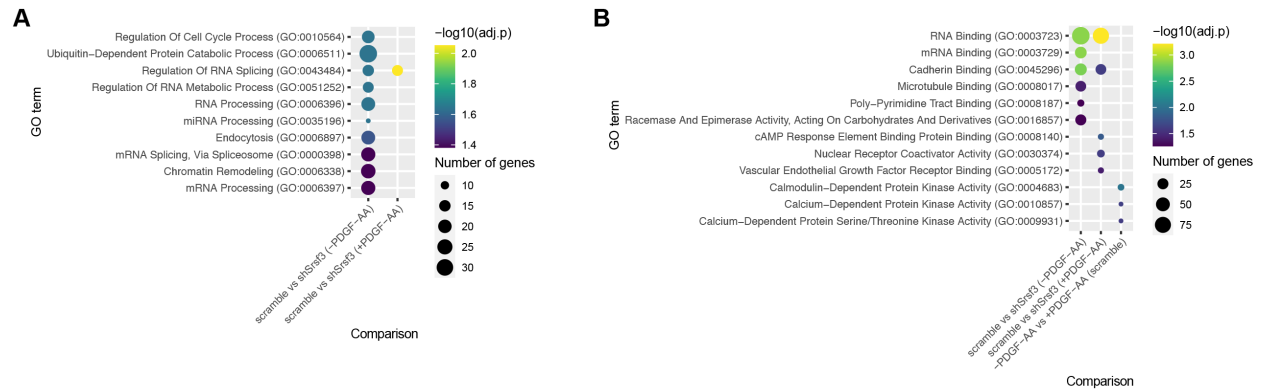

**Figure S4. Gene ontology analysis of alternatively-spliced transcripts across treatment comparisons. (A,B)** Bubble plots depicting up to ten of the most significant gene ontology (GO) terms for biological process (A) and molecular function (B) for Srsf3-dependent and PDGF-AA-dependent alternatively-spliced transcripts. Colors correspond to  $-\log_{10}(\text{adjusted p-value})$ ; sizes correspond to number of genes.

| -PDGF-AA                                                                            |                                      |                                        |                        | +PDGF-AA                                                                            |                                      |                                        |                        |
|-------------------------------------------------------------------------------------|--------------------------------------|----------------------------------------|------------------------|-------------------------------------------------------------------------------------|--------------------------------------|----------------------------------------|------------------------|
| Sequence logo                                                                       | Occurrence in eCLIP (per 1000 peaks) | Occurrence in control (per 1000 peaks) | p-value                | Sequence logo                                                                       | Occurrence in eCLIP (per 1000 peaks) | Occurrence in control (per 1000 peaks) | p-value                |
|    | 4095                                 | 991                                    | $<2.2 \times 10^{-16}$ |    | 1432                                 | 465                                    | $<2.2 \times 10^{-16}$ |
|    | 4281                                 | 1209                                   | $<2.2 \times 10^{-16}$ |    | 2032                                 | 649                                    | $<2.2 \times 10^{-16}$ |
|    | 1307                                 | 555                                    | $3.6 \times 10^{-11}$  |    | 2029                                 | 726                                    | $<2.2 \times 10^{-16}$ |
|    | 4239                                 | 1135                                   | $<2.2 \times 10^{-16}$ |    | 1279                                 | 353                                    | $<2.2 \times 10^{-16}$ |
|    | 602                                  | 253                                    | $5.4 \times 10^{-15}$  |    | 833                                  | 315                                    | $<2.2 \times 10^{-16}$ |
|    | 4286                                 | 1151                                   | $<2.2 \times 10^{-16}$ |    | 1273                                 | 436                                    | $<2.2 \times 10^{-16}$ |
|  | 4169                                 | 1116                                   | $<2.2 \times 10^{-16}$ |  | 1660                                 | 663                                    | $<2.2 \times 10^{-16}$ |
|  | 1233                                 | 488                                    | $<2.2 \times 10^{-16}$ |  | 1486                                 | 636                                    | $7.5 \times 10^{-16}$  |
|  | 3970                                 | 1026                                   | $<2.2 \times 10^{-16}$ |  | 1726                                 | 631                                    | $<2.2 \times 10^{-16}$ |
|  | 758                                  | 307                                    | $3.0 \times 10^{-10}$  |  | 1383                                 | 545                                    | $<2.2 \times 10^{-16}$ |

**Figure S5. PDGFR $\alpha$  signaling influences Srsf3 binding specificity.** Top 10 motifs enriched in eCLIP peaks in the absence (left) or presence (right) of PDGF-AA stimulation with associated *P* values.

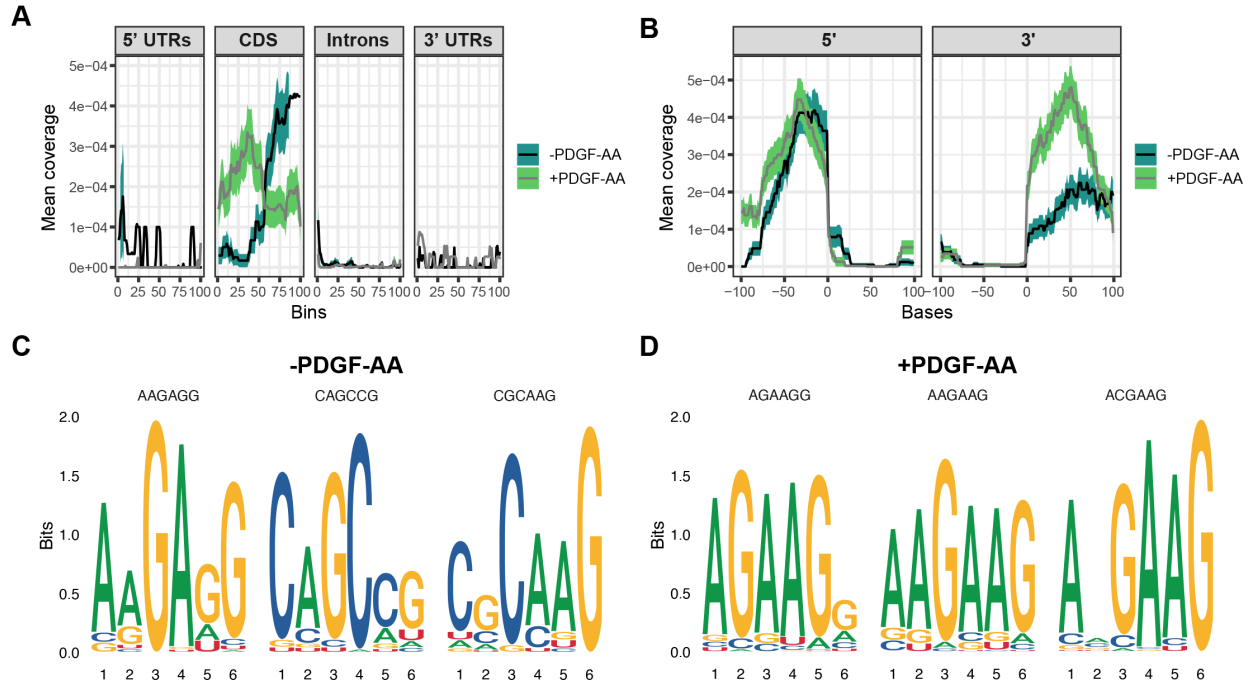

**Figure S6. Srsf3 exhibits differential transcript binding upon PDGFR $\alpha$  signaling in the subset of transcripts from the high-confidence, overlapping datasets. (A,B)** Mean coverage of eCLIP peaks within the high-confidence, overlapping datasets across various transcript locations (A) and surrounding the 5' and 3' splice sites (B) in the absence or presence of PDGF-AA stimulation. **(C,D)** Top three motifs enriched in eCLIP peaks within the high-confidence, overlapping datasets in the absence (C) or presence (D) of PDGF-AA stimulation.

**Table S1. RNA-seq sample information.**

| Sample              | Raw read pairs | Trimmed read pairs for Salmon input | Salmon mapping rate | Trimmed read pairs (125 bp) for STAR input | STAR unique mapping rate |
|---------------------|----------------|-------------------------------------|---------------------|--------------------------------------------|--------------------------|
| -PDGF-AA scramble_1 | 47181591       | 44410442                            | 0.89055             | 36343779                                   | 0.8773                   |
| -PDGF-AA scramble_2 | 54612492       | 50500367                            | 0.878847            | 39971864                                   | 0.8681                   |
| -PDGF-AA scramble_3 | 69353787       | 65529075                            | 0.912399            | 48327896                                   | 0.9022                   |
| -PDGF-AA shSrsf3_1  | 91657568       | 84086217                            | 0.913324            | 61269254                                   | 0.9035                   |
| -PDGF-AA shSrsf3_2  | 77309551       | 71220292                            | 0.91638             | 49390634                                   | 0.9013                   |
| -PDGF-AA shSrsf3_3  | 42645900       | 41078549                            | 0.910338            | 28737018                                   | 0.9054                   |
| +PDGF-AA scramble_1 | 71080979       | 66836059                            | 0.916828            | 48116755                                   | 0.9027                   |
| +PDGF-AA scramble_2 | 69667521       | 64974624                            | 0.890505            | 47762451                                   | 0.884                    |
| +PDGF-AA scramble_3 | 78680108       | 72721916                            | 0.911689            | 52936280                                   | 0.9008                   |
| +PDGF-AA shSrsf3_1  | 42776470       | 41165756                            | 0.914797            | 28076373                                   | 0.9019                   |
| +PDGF-AA shSrsf3_2  | 37944773       | 35759828                            | 0.908637            | 23528077                                   | 0.8987                   |
| +PDGF-AA shSrsf3_3  | 36391090       | 34257983                            | 0.911463            | 26455873                                   | 0.8995                   |

**Table S2. DEseq2 output.****Table S3. rMATS output for scramble (-PDGF-AA) versus shSrsf3 (-PDGF-AA) RNA-seq analysis.****Table S4. rMATS output for scramble (+PDGF-AA) versus shSrsf3 (+PDGF-AA) RNA-seq analysis.****Table S5. rMATS output for -PDGF-AA (scramble) versus +PDGF-AA (scramble) RNA-seq analysis.****Table S6. rMATS output for -PDGF-AA (shSrsf3) versus +PDGF-AA (shSrsf3) RNA-seq analysis.****Table S7. eCLIP sample information.**

| Sample                      | Raw read pairs | Trimmed read pairs | Collapsed reads | Reads after removing repetitive elements | Mapped reads | Peaks | Annotated Peaks |
|-----------------------------|----------------|--------------------|-----------------|------------------------------------------|--------------|-------|-----------------|
| -PDGF-AA size-matched input | 34303575       | 22904092           | 13449745        | 13358235                                 | 17206        | 6969  | 6607            |
| -PDGF-AA replicate 1        | 22983544       | 18369023           | 2758371         | 2758371                                  | 440436       |       |                 |
| -PDGF-AA replicate 2        | 15666256       | 12263540           | 2742638         | 2065674                                  | 388996       |       |                 |
| +PDGF-AA size-matched input | 52420337       | 37454316           | 13811675        | 13643948                                 | 24275        | 9075  | 8623            |
| +PDGF-AA                    | 30105052       | 23355466           | 3417325         | 2845801                                  | 872085       |       |                 |



**Table S8. eCLIP output.**

**Table S9. Raw peak counts of eCLIP peaks across various transcript locations.**

**Table S10. Matt output.**

**Table S11. List of transcripts and genes from Venn diagram in Figure 5A.**

**Table S12. High confidence, overlapping dataset output correlating eCLIP with scramble (-PDGF-AA) versus shSrsf3 (-PDGF-AA) rMATS RNA-seq analysis.**

**Table S13. High confidence, overlapping dataset output correlating eCLIP with scramble (+PDGF-AA) versus shSrsf3 (+PDGF-AA) rMATS RNA-seq analysis.**

**Table S14. High confidence, overlapping dataset output correlating eCLIP with -PDGF-AA (scramble) versus +PDGF-AA (scramble) rMATS RNA-seq analysis.**

**Table S15. High confidence, overlapping dataset output correlating eCLIP with -PDGF-AA (shSrsf3) versus +PDGF-AA (shSrsf3) rMATS RNA-seq analysis.**

**Table S16. Primers used in qPCR analysis.**

| <b>Transcript</b> | <b>Forward primer (5' to 3')</b> | <b>Reverse primer (5' to 3')</b> |
|-------------------|----------------------------------|----------------------------------|
| <i>Arhgap12</i>   | GGAGACATAGCACCATTTGTG            | GCACTGCCCAAGAAGACAAC             |
| <i>Cep55</i>      | CCTTTCGGCTCCTTTGAACT             | GCAGTGTCTGACTTGGAGCT             |
| <i>Wdr81</i>      | GCTTTGTGGACTGCAGGAAG             | GCAGGGAACAGACACCAATC             |
